# Supplementary material for: Cost-Effectiveness of Computer-Assisted Cognitive Behavioral Therapy for Depression Among Adults in Primary Care
Source: PubMed Central journal article supplement (PMC11565263; doi:10.1001/jamanetworkopen.2024.44599), 2024-11-14
Supplement: jamanetwopen-e2444599-s001.pdf [file jamanetwopen-e2444599-s001.pdf]

## Supplemental Online Content

Ali S, Alemu FW, Owen J, et al. Cost-effectiveness of computer-assisted cognitive behavioral therapy for depression among adults in primary care. *JAMA Netw Open*. 2024;7(11):e2444599. doi:10.1001/jamanetworkopen.2024.44599

**eTable 1.** Cumulative Costs and QALYs

**eTable 2.** Base-Case and Extrapolation Using Longer Time Horizons for the Treatment Benefit

This supplemental material has been provided by the authors to give readers additional information about their work.

**eTable 1. Cumulative costs and QALYs**

| <b>Time horizon</b> | <b>Group</b> | <b>Total Cost (95% CI)</b> | <b>Incremental Cost (95% CI)</b> | <b>Total QALY (95% CI)</b> | <b>Incremental QALY (95% CI)</b> | <b>ICER* (95% CI)</b>               |
|---------------------|--------------|----------------------------|----------------------------------|----------------------------|----------------------------------|-------------------------------------|
| 12-week             | TAU          | 0                          | -                                | 0.123<br>(0.122, 0.123)    | -                                | -                                   |
|                     | CCBT         | 714.64<br>(662.53, 766.75) | 714.64<br>(662.53, 766.75)       | 0.128<br>(0.128, 0.129)    | 0.0059<br>(0.0022, 0.0097)       | 124,646.10<br>(88508.63, 179872.28) |
| 3-month             | TAU          | 0                          | -                                | 0.270<br>(0.269, 0.270)    | -                                | -                                   |
|                     | CCBT         | 714.64<br>(662.53, 766.75) | 714.64<br>(662.53, 766.75)       | 0.284<br>(0.283, 0.284)    | 0.0142<br>(0.0034, 0.0250)       | 53230.40<br>(34661.42, 91493.12)    |
| 6-month             | TAU          | 0                          | -                                | 0.416<br>(0.415, 0.416)    | -                                | -                                   |
|                     | CCBT         | 714.64<br>(662.53, 766.75) | 714.64<br>(662.53, 766.75)       | 0.437<br>(0.436, 0.437)    | 0.0209<br>(0.003, 0.039)         | 37295.43<br>(22723.86, 66546.14)    |

\* The values are based on 1000 multiple imputations and pooled using Rubin's rule.

**eTable 2. Base-case and extrapolation using longer time horizons for the treatment benefit**

| <b>Base-Case</b>                                                                                         |                   |                       |                                 |
|----------------------------------------------------------------------------------------------------------|-------------------|-----------------------|---------------------------------|
| <b>Time horizon</b>                                                                                      | <b>Mean QALYs</b> | <b>Mean Cost (\$)</b> | <b>ICER (95% CI)</b>            |
| 12-week                                                                                                  | 0.0059            | 714.64                | 124646.10 (88508.63, 179872.28) |
| 3-month                                                                                                  | 0.0142            | 714.64                | 53230.40 (34661.42, 91493.12)   |
| 6-month                                                                                                  | 0.0209            | 714.64                | 37295.43 (22723.86, 66546.14)   |
| <b>Extrapolation scenario 1: Assuming treatment benefit reduces over time</b>                            |                   |                       |                                 |
| <b>Time horizon</b>                                                                                      | <b>Mean QALYs</b> | <b>Mean Cost (\$)</b> | <b>ICER (95% CI)</b>            |
| 12-month                                                                                                 | 0.0389            | 714.64                | 19851.20 (11822.72, 35920.23)   |
| 24-month                                                                                                 | 0.0687            | 714.64                | 11541.41 (6526.72, 22784.19)    |
| 36-month                                                                                                 | 0.0900            | 714.64                | 8947.31 (4956.65, 18525.27)     |
| 48-month                                                                                                 | 0.1028            | 714.64                | 7899.44 (4320.28, 16652.41)     |
| 60-month                                                                                                 | 0.1070            | 714.64                | 7605.03 (4132.38, 16085.32)     |
| <b>Extrapolation scenario 2: Assuming treatment benefit remains stable at the end of trial follow-up</b> |                   |                       |                                 |
| <b>Time horizon</b>                                                                                      | <b>Mean QALYs</b> | <b>Mean Cost (\$)</b> | <b>ICER (95% CI)</b>            |
| 12-month                                                                                                 | 0.0400            | 714.64                | 19341.12 (11499.22, 35223.39)   |
| 24-month                                                                                                 | 0.0783            | 714.64                | 10202.58 (5697.35, 20648.06)    |
| 36-month                                                                                                 | 0.1166            | 714.64                | 7020.52 (3764.04, 15175.45)     |
| 48-month                                                                                                 | 0.1549            | 714.64                | 5409.87 (2774.73, 12158.36)     |
| 60-month                                                                                                 | 0.1931            | 714.64                | 4495.60 (2207.93, 10080.23)     |
