# Supplementary material for: Cost-Effectiveness of Computer-Assisted Cognitive Behavioral Therapy for Depression Among Adults in Primary Care
Source: PubMed Central journal article supplement (PMC11565263; doi:10.1001/jamanetworkopen.2024.44599), 2024-11-14
Supplement: jamanetwopen-e2444599-s002.pdf [file jamanetwopen-e2444599-s002.pdf]

## Data Sharing Statement

Ali. Cost-Effectiveness of Computer-Assisted Cognitive Behavioral Therapy for Depression Among Adults in Primary Care. *JAMA Netw Open*. Published November 13, 2024.  
doi:10.1001/jamanetworkopen.2024.44599

### Data

**Data available:** No
